# Supplementary material
Source: Springer Nature journal article supplement (https://www.springermedizin.de/resource/supplementary/12986_2009_212_MOESM4_ESM.pdf/25655604)

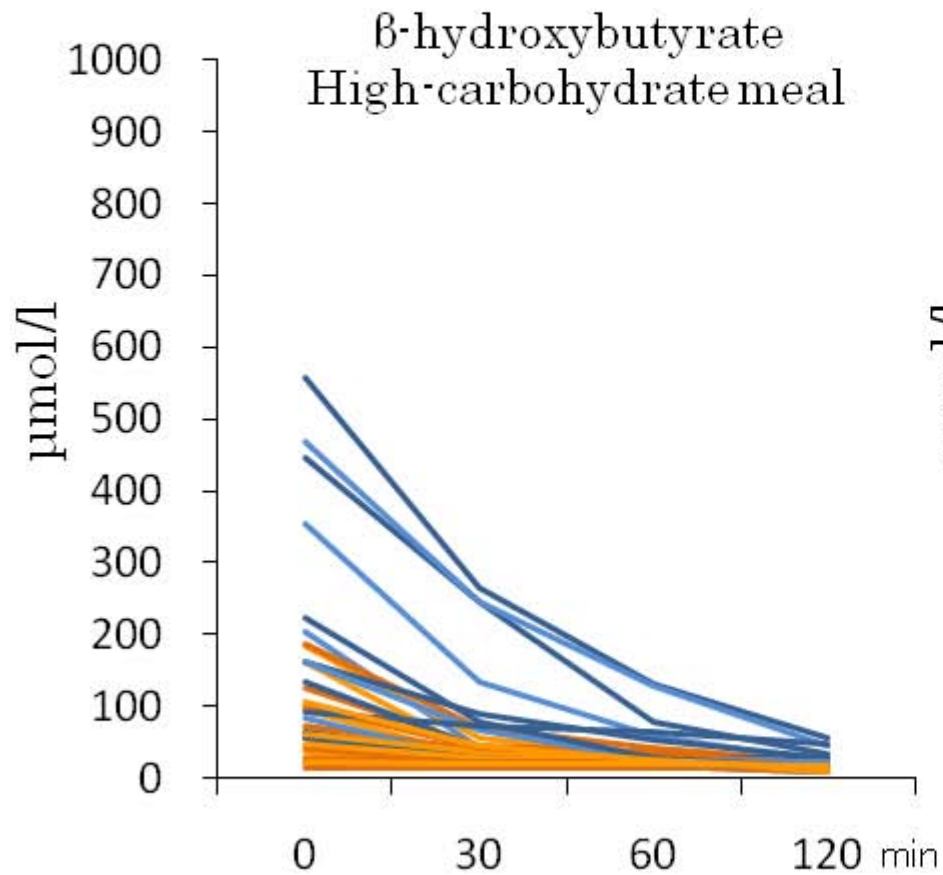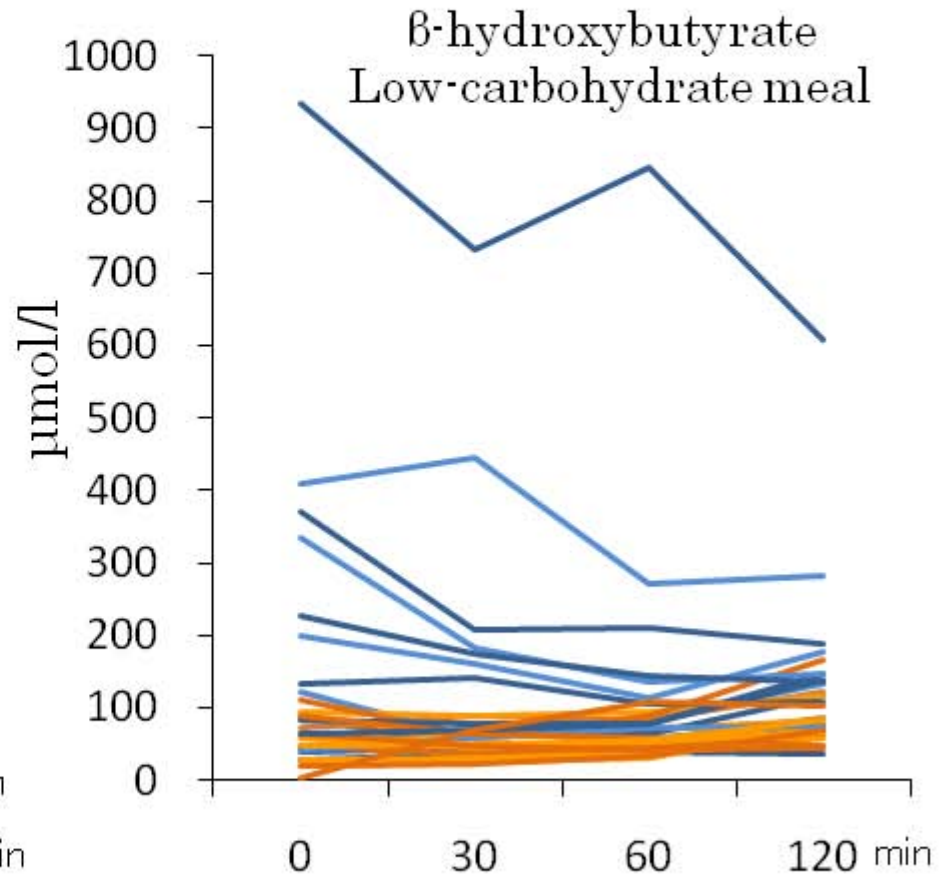

Supplement: MOESM4 [file 25655604]
